# Supplementary material for: Correlation of respiratory oscillometry with CT image analysis in a prospective cohort of idiopathic pulmonary fibrosis
Source: PubMed Central journal article supplement — BMJ Open Respir Res. 2022 Apr 8;9(1):e001163. doi: 10.1136/bmjresp-2021-001163 (PMC8996008; doi:10.1136/bmjresp-2021-001163), 2022-04-08
Supplement: bmjresp-2021-001163supp001.pdf [file bmjresp-2021-001163supp001.pdf]

## **Correlation of Respiratory Oscillometry with CT Image Analysis in a Prospective Cohort of Idiopathic Pulmonary Fibrosis**

### **Supplemental Materials**

Joyce K. Y. Wu, BSc<sup>1,2</sup>, Jin Ma, PhD<sup>3</sup>, Lena Nguyen, MD<sup>1</sup>, Emily DeHaas, MD<sup>1</sup>, Anastasiia Vasileva, M.D<sup>1</sup>, Ehren Chang<sup>1</sup>, Jady Liang, BSc<sup>1</sup>, Qian Huang, BSc<sup>1</sup>, Antonio Cassano, BA<sup>1</sup>, Matthew Binnie, MD<sup>1</sup>, Shane Shapera, MD<sup>1</sup>, Jolene H. Fisher, MD<sup>1</sup>, Clodagh M. Ryan, MBBCh, MD<sup>1,2</sup>, Micheal McInnis, MD<sup>4</sup>, Zoltán Hantos, PhD<sup>5</sup>, Chung-Wai Chow MD, PhD<sup>1</sup>

<sup>1</sup>Division of Respirology, Department of Medicine, University Health Network, Toronto, Canada

<sup>2</sup>Toronto General-Pulmonary Function Laboratory, University Health Network, Toronto, Canada

<sup>3</sup>Biostatistic Research Unit, University Health Network, Toronto, Canada

<sup>4</sup>Joint Department of Medical Imaging, University Health Network, Toronto, Canada

<sup>5</sup>Department of Anesthesiology and Intensive Therapy, Semmelweis University, Budapest, Hungary

**Supplemental Table S1. Comparison of the IPF and Healthy Cohort**

Data are shown as median (interquartile range). Statistics was performed using the Mann-Whitney U test.

|                                                       | <b>IPF (n = 89)</b> | <b>Healthy Subjects (n=45)</b> | <b>P-value</b>    |
|-------------------------------------------------------|---------------------|--------------------------------|-------------------|
| Sex (M/F)                                             | 60/29               | 16/29                          |                   |
| Age                                                   | 70.6 (10.4)         | 37.5 (15.3)                    | <b>&lt;0.0001</b> |
| Height (cm)                                           | 168.0 (13.0)        | 168.0 (11.0)                   | 0.62              |
| Weight (kg)                                           | 76.7 (19.3)         | 67.0 (25.0)                    | <b>0.006</b>      |
| BMI                                                   | 27.1 (4.1)          | 23.7 (6.1)                     | <b>&lt;0.0001</b> |
| Smoking Status                                        |                     |                                |                   |
| Never smoked                                          | 34                  | 45                             | <b>&lt;0.0001</b> |
| Ex-smoker < 20 pack years                             | 28                  | 0                              |                   |
| Ex-smoker ≥ 20 pack years                             | 27                  | 0                              |                   |
| FVC (L)                                               | 2.5 (1.0)           | 4.0 (1.3)                      | <b>&lt;0.0001</b> |
| %Pred FVC                                             | 67.4 (23.1)         | 97.5 (4.9)                     | <b>&lt;0.0001</b> |
| FEV <sub>1</sub> (L)                                  | 2.0 (0.8)           | 3.3 (0.9)                      | <b>&lt;0.0001</b> |
| %Pred FEV <sub>1</sub>                                | 74.6 (24.2)         | 96.1 (7.1)                     | <b>&lt;0.0001</b> |
| FEV <sub>1</sub> /FVC                                 | 80.3 (6.8)          | 80.7 (4.1)                     | 0.67              |
| R5 (cm H <sub>2</sub> O·s/L)                          | 3.4 (1.2)           | 3.1 (1.1)                      | <b>0.01</b>       |
| %Pred R5                                              | 113.6 (36.5)        | 108 (29.9)                     | <b>0.038</b>      |
| R19 (cm H <sub>2</sub> O·s/L)                         | 2.8 (1.0)           | 3.0 (1.1)                      | 0.23              |
| %Pred R19                                             | 98.5 (29.9)         | 105.8 (30.5)                   | 0.49              |
| R5-19 (cm H <sub>2</sub> O·s/L)                       | 0.6 (0.6)           | 0.0 (0.4)                      | <b>&lt;0.0001</b> |
| %Pred R5-19                                           | 245.1 (409.3)       | 54.4 (293.2)                   | 0.99              |
| X5 (cm H <sub>2</sub> O·s/L)                          | -2.1 (1.1)          | -1.0 (0.4)                     | <b>&lt;0.0001</b> |
| %Pred X5                                              | 171.9 (87.6)        | 95.7 (35.3)                    | <b>&lt;0.0001</b> |
| X5in (cm H <sub>2</sub> O·s/L)                        | -2.1 (1.1)          | -1.0 (0.4)                     | <b>&lt;0.0001</b> |
| X5ex (cm H <sub>2</sub> O·s/L)                        | -2.0 (1.4)          | -0.9 (0.5)                     | <b>&lt;0.0001</b> |
| ΔX5 (cm H <sub>2</sub> O·s/L)                         | -0.3 (0.5)          | -0.1 (0.2)                     | <b>&lt;0.0001</b> |
| AX (cm H <sub>2</sub> O/L)                            | 12.8 (12.8)         | 3.1 (2.6)                      | <b>&lt;0.0001</b> |
| %Pred AX                                              | 413 (408)           | 133 (94)                       | <b>&lt;0.0001</b> |
| Fres (Hz)                                             | 21.3 (5)            | 11.5 (3.7)                     | <b>&lt;0.0001</b> |
| %Pred Fres                                            | 167 (47)            | 107 (28)                       | <b>&lt;0.0001</b> |
| ReE (cm H <sub>2</sub> O·s/L)                         | 3.0 (1.2)           | 2.4 (0.8)                      | <b>0.001</b>      |
| ReI (cm H <sub>2</sub> O·s/L)                         | 2.2 (0.8)           | 2.1 (0.8)                      | 0.123             |
| ReE-ReI (cm H <sub>2</sub> O·s/L)                     | 0.7 (0.8)           | 0.5 (0.4)                      | <b>0.01</b>       |
| (ReE-ReI)/VT (cm H <sub>2</sub> O·s/L <sup>2</sup> )  | 1.0 (1.0)           | 0.5 (0.5)                      | <b>&lt;0.001</b>  |
| XeE (cm H <sub>2</sub> O·s/L)                         | -0.3 (0.7)          | 0.2 (0.4)                      | <b>&lt;0.001</b>  |
| XeI (cm H <sub>2</sub> O·s/L)                         | -0.7 (0.8)          | 0.1 (0.3)                      | <b>&lt;0.001</b>  |
| XeE-XeI (cm H <sub>2</sub> O·s/L)                     | 0.4 (0.6)           | 0.1 (0.2)                      | <b>&lt;0.001</b>  |
| (XeE-XeI)/VT (cm H <sub>2</sub> O·s/ L <sup>2</sup> ) | 0.6 (0.7)           | 0.1 (0.3)                      | <b>&lt;0.001</b>  |

**Supplemental Table S2. Comparison of PFT and Osc parameters based on smoking status**

|                                                      | Never Smoked  | < 20 pack years | ≥ 20 pack years | P-value      |
|------------------------------------------------------|---------------|-----------------|-----------------|--------------|
| Sex (M/F)                                            | 16/18         | 20/8            | 24/3            |              |
| Age                                                  | 69.9 (10.7)   | 72.4 (9.5)      | 70.2 (8.7)      | 0.83         |
| Height (cm)                                          | 163 (16.8)    | 168.5 (10.5)    | 170.0 (15.5)    | <b>0.02</b>  |
| Weight (kg)                                          | 70.2 (19.0)   | 76.2 (16.2)     | 80.6 (13.5)     | <b>0.02</b>  |
| BMI                                                  | 26.8 (5.6)    | 27.2 (4.1)      | 27.4 (3.3)      | 0.43         |
| FVC (L)                                              | 2.2 (0.9)     | 2.7 (0.8)       | 2.9 (1.0)       | <b>0.03</b>  |
| %Pred FVC                                            | 66.3 (32.2)   | 72.4 (18.2)     | 66.3 (16.3)     | 0.69         |
| FEV <sub>1</sub> (L)                                 | 1.8 (0.8)     | 2.1 (0.8)       | 2.3 (0.8)       | <b>0.02</b>  |
| %Pred FEV <sub>1</sub>                               | 76.1 (32.5)   | 75.2 (16.6)     | 70.4 (22.0)     | 0.47         |
| FEV <sub>1</sub> /FVC                                | 80.1 (8.1)    | 81.0 (6.2)      | 78.4 (6.6)      | 0.85         |
| TLC (L)                                              | 4.0 (1.1)     | 4.2 (1.3)       | 4.5 (1.2)       | 0.10         |
| %Pred TLC                                            | 69.6 (23.2)   | 69.5 (13.6)     | 65.7 (7.9)      | 0.70         |
| DLCO (mL/min/mmHg)                                   | 10.6 (3.7)    | 9.2 (6.0)       | 9.3 (4.8)       | 0.75         |
| %Pred DLCO                                           | 65.4 (23.9)   | 60.4 (18.4)     | 56.9 (22.3)     | 0.13         |
| R5 (cm H <sub>2</sub> O·s/L)                         | 3.6 (2.0)     | 3.2 (1.0)       | 3.5 (0.6)       | 0.24         |
| %Pred R5                                             | 115.0 (29.2)  | 110.3 (23.1)    | 119.3 (45.6)    | 0.26         |
| R19 (cm H <sub>2</sub> O·s/L)                        | 2.9 (1.1)     | 2.6 (1.0)       | 2.7 (0.8)       | 0.50         |
| %Pred R19                                            | 101.0 (22.0)  | 96.6 (29.0)     | 101.2 (46.8)    | 0.10         |
| R5-19 (cm H <sub>2</sub> O·s/L)                      | 0.7 (0.8)     | 0.5 (0.6)       | 0.6 (0.6)       | 0.24         |
| %Pred R5-19                                          | 171.7 (535.0) | 264.5 (308.5)   | 252.3 (280.8)   | 0.38         |
| X5 (cm H <sub>2</sub> O·s/L)                         | -2.4 (1.6)    | -1.9 (1.1)      | -1.8 (0.9)      | <b>0.001</b> |
| %Pred X5                                             | 186.5 (88.1)  | 141.8 (81.6)    | 171.4 (71.5)    | <b>0.009</b> |
| X5 <sub>in</sub> (cm H <sub>2</sub> O·s/L)           | -2.5 (1.3)    | -2.0 (1.0)      | -1.8 (0.9)      | <b>0.001</b> |
| X5 <sub>ex</sub> (cm H <sub>2</sub> O·s/L)           | -2.2 (1.7)    | -1.7 (1.0)      | -1.8 (0.9)      | <b>0.005</b> |
| ΔX5 (cm H <sub>2</sub> O·s/L)                        | -0.3 (0.5)    | -0.2 (0.4)      | -0.2 (0.4)      | 0.97         |
| AX (cm H <sub>2</sub> O/L)                           | 16.6 (16.8)   | 10.3 (9.7)      | 11.8 (11.7)     | <b>0.006</b> |
| %Pred AX                                             | 440.5 (455.8) | 338.8 (207.0)   | 438.4 (335.6)   | 0.07         |
| Fres (Hz)                                            | 22.5 (8.0)    | 20.1 (5.3)      | 21.4 (3.0)      | 0.07         |
| %Pred Fres                                           | 177.0 (51.2)  | 155.3 (39.7)    | 169.4 (40.1)    | 0.07         |
| ReE (cm H <sub>2</sub> O·s/L)                        | 3.3 (1.6)     | 2.1 (0.8)       | 2.9 (0.8)       | 0.36         |
| ReI (cm H <sub>2</sub> O·s/L)                        | 2.3 (1.0)     | 2.1 (0.8)       | 2.1 (0.6)       | 0.12         |
| ReE-ReI (cm H <sub>2</sub> O·s/L)                    | 0.7 (0.6)     | 0.7 (0.9)       | 0.7 (0.9)       | 0.78         |
| (ReE-ReI)/VT (cm H <sub>2</sub> O·s/L <sup>2</sup> ) | 1.0 (1.1)     | 1.1 (0.9)       | 0.8 (1.0)       | 0.41         |
| XeE (cm H <sub>2</sub> O·s/L)                        | -0.4 (0.8)    | -0.2 (0.5)      | -0.2 (0.4)      | <b>0.05</b>  |
| XeI (cm H <sub>2</sub> O·s/L)                        | -0.8 (0.6)    | -0.5 (0.6)      | -0.7 (0.7)      | 0.09         |
| XeE-XeI (cm H <sub>2</sub> O·s/L)                    | 0.4 (0.4)     | 0.2 (0.4)       | 0.4 (0.4)       | 0.47         |
| (XeE-XeI)/VT (cm H <sub>2</sub> O·s/L <sup>2</sup> ) | 0.5 (0.9)     | 0.4 (0.7)       | 0.6 (0.6)       | 0.74         |

Data shown are median (interquartile range). Statistics was performed with One-Way ANOVA.

**Supplemental Table S3. Summary of Automated Lung Texture CT Analyses**

|                             | <b>(n=26)</b> |
|-----------------------------|---------------|
| <b>TLC<sub>CT</sub> (L)</b> | 3.5 ± 1.1     |
| <b>PVV</b>                  | 5.3 ± 2.4     |
| <b>% Normal volume</b>      | 76.9 ± 15.9   |
| <b>ILD extent</b>           | 20.8 ± 16.3   |
| % Ground glass              | 15.6 ± 13.3   |
| % Reticular                 | 4.9 ± 4.2     |
| % Honeycomb                 | 0.3 ± 0.4     |

Data are shown as mean ± standard deviation. ILD extent = sum of %ground glass, %reticular and %honeycomb; PVV = pulmonary vessel volume; TLC<sub>CT</sub> = total lung capacity measured by computed tomography.

**Supplemental Figure S1.** Example of high resolution CT scan images in patient with IPF analyzed with the Lung Texture Analysis. (A) Single axial non-contrast image in lung windows demonstrates subpleural ground glass opacity, reticulation, traction bronchiectasis, and mild honeycombing. (B) Automated quantitative CT segments the lung from the chest and identifies normal (green), ground glass (yellow), reticular (orange), and honeycomb (purple) textures.

A

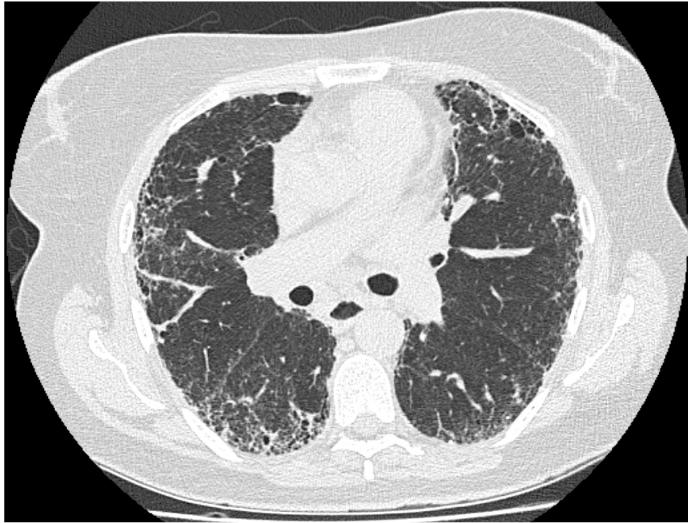

B

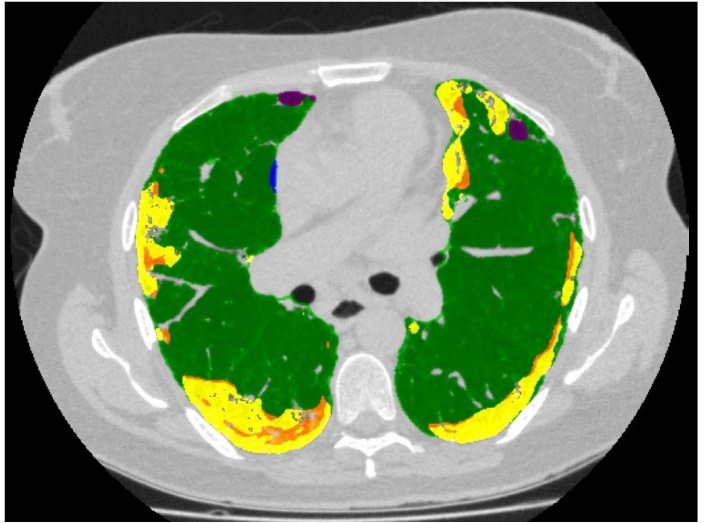

**Supplemental Figure S2. Correlations between Conventional PFTs and CT-derived Metrics**

The coefficient of determination,  $R^2$  was derived using polynomial with 2 degrees regression. Similar observations (not shown) were made using linear and exponential regression.

|                         | <b>%FVC</b> | <b>FVC</b> | <b>%FEV<sub>1</sub></b> | <b>FEV<sub>1</sub></b> | <b>%TLC</b> | <b>TLC</b> | <b>%DLCO</b> | <b>DLCO</b> |
|-------------------------|-------------|------------|-------------------------|------------------------|-------------|------------|--------------|-------------|
| <b>TLC<sub>CT</sub></b> | 0.244       | 0.663      | 0.535                   | 0.628                  | 0.460       | 0.628      | 0.000        | 0.091       |
| <b>PVV</b>              | 0.117       | 0.247      | 0.077                   | 0.171                  | 0.598       | 0.479      | 0.092        | 0.252       |
| <b>ILD Extent</b>       | 0.180       | 0.258      | 0.159                   | 0.216                  | 0.715       | 0.385      | 0.089        | 0.149       |
| <b>% Ground Glass</b>   | 0.244       | 0.305      | 0.204                   | 0.270                  | 0.811       | 0.338      | 0.095        | 0.099       |
| <b>% Reticular</b>      | 0.004       | 0.011      | 0.000                   | 0.001                  | 0.148       | 0.306      | 0.079        | 0.180       |
| <b>% Honeycomb</b>      | 0.000       | 0.000      | 0.000                   | 0.027                  | 0.000       | 0.000      | 0.322        | 0.267       |

ILD extent = sum of %ground glass, %reticular and %honeycomb; PVV = pulmonary vessel volume; TLC<sub>CT</sub> = total lung capacity measured by computed tomography.
